# Supplementary material for: Numerical Investigation of Oil–Water Exchange Behaviors in Shale During Post-Fracturing Soaking Periods
Source: Frontiers journal article supplement (doi:10.3389/feart.2021.735972), 2021-10-14
Supplement: Data_Sheet_1.doc [file Data_Sheet_1.doc]

Numerical Investigation of Oil-Water Exchange Behaviors in Shale

during Post-fracturing Soaking Periods

Fei Wang, Qiaoyun Chen, Jingchen Zhang, Yingqi Ruan, Ye Zhuang, Jian Zhu, Shicheng Zhang

State Key Laboratory of Petroleum Resources and Prospecting, China University of Petroleum (Beijing), Beijing

**Appendix SA**

In Appendix SA, the shape factors are presented as follows.

(1) the shape factor between *F* and *f*,

The fluid mass transfer between a grid of *F* and that of *f* is defined as:

# (A1)

Based on the flux rate of dual media, the fluid mass transfer between *F* and *f* can be defined as:

# (A2)

Therefore,

# (A3)

# where is the grid dimension in x direction [m]; is the grid dimension in y direction [m].

(2) the shape factor between *f* and *m*,

The shape factor proposed by Kazemi et al. [30] is used in this study to characterize the complexity of *f* in this study. The link between the induced natural fracture density and this shape factor has been obtained by Yan et al [37].

# (A4)

where *di* is the distance from a fracture surface to the center of matrix [m]; *I* is the number of fracture surfaces; *V* is the volume of matrix [m3]; *Ai* is the area of the fracture surface *i* that is exposed to the matrix [m2].

(3) the shape factor between *W* and *F*,

The fluid rate per unit area of the horizontal wellbore is defined as:

# (A5)

(A6)

According to the inner boundary condition: , the fluid rate can also be defined as:

(A7)

Therefore,

(A8)

where is the radius of the wellbore [m]; is the radius of drainage area [m].

**Appendix SB**

In Appendix SB, the model solution is presented as follows. The solution algorithm starts with equation discretization, followed by calculating the transmissibility terms with the upwind method, after which the difference equation is solved. The flow equation for water transport in *f* is a demo, which is presented as follows.

When *j* =*w*, equation (8) is given as:

(B1)

Equation (B1) is expanded as a partial differential equation, given by

(B2)

The discretized expression of the left side is given by:

(B3)

The 1st term on the right side is given by:

(B4)

Based on this expression at step *n*, the expression at step [*n*+1] is given by

(B5)

The 2nd term on the right side is expressed as:

(B6)

The 3rd term on the right side is given by:

(B7)

After the equation discretization, the transmissibility term is calculated with the upwind method, the principle of which is to determine the transport direction of fluid between grids and to use the transmissibility in source grids. The linear equations with the coefficient matrix are obtained after these steps, so solving them with the boundary conditions and the initial condition obtains the unknown parameters at the step [*n*+1]. The computation is repeated until the end of simulation.
